# Supplementary material for: Prevalence, Awareness, Treatment, Control, and Related Factors of Hypertension among Tajik Nomads Living in Pamirs at High Altitude
Source: Hindawi journal article supplement (doi:10.1155/2020/5406485), 2020-07-14
Supplement: f1 [file 5406485.f1.pdf]

Supplementary -Table 1. Mean systolic and diastolic blood pressure by age and sex

| Age group | SBP        |             | P value | DBP       |           | P value | Total      |           |
|-----------|------------|-------------|---------|-----------|-----------|---------|------------|-----------|
|           | Male       | Female      |         | Male      | Female    |         | SBP        | DBP       |
| 18-44     | 123.3±18.5 | 122.8 ±18.3 | 0.786   | 73.2±10.8 | 72.7±11.1 | 0.626   | 123.0±18.4 | 72.9±10.9 |
| 45-59     | 127.3±20.9 | 130.4±23.4  | 0.322   | 74.7±10.8 | 76.2±12.3 | 0.316   | 129.1±22.4 | 75.5±11.7 |
| ≥60       | 131.6±24.6 | 128.9±18.5  | 0.512   | 76.3±13.7 | 76.0±11.9 | 0.895   | 130.2±21.5 | 76.2±12.7 |
| P value   | 0.017      | 0.002       | -       | 0.013     | 0.169     | -       | < 0.001    | 0.004     |
| Total     | 125.5±20.1 | 125.7±20.1  | 0.873   | 74.2±11.3 | 74.3±11.8 | 0.931   | 125.6±20.2 | 74.1±11.5 |

SBP, systolic blood pressure; DBP, diastolic blood pressure
